# Supplementary material for: The role of climate and emission changes in future air quality over southern Canada and northern Mexico
Source: Copernicus journal article supplement (doi:10.5194/acp-8-3973-2008), 2008-07-24
Supplement: Supplementary file 1 [file acp-8-3973-2008-supplement.pdf]

NO<sub>x</sub>: Future summers – Historic summers

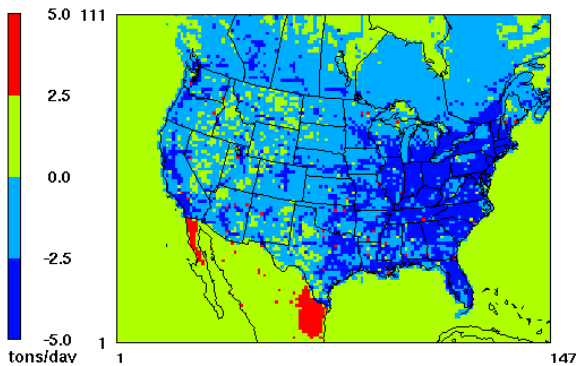

(a)

SO<sub>2</sub>: Future summers – Historic summers

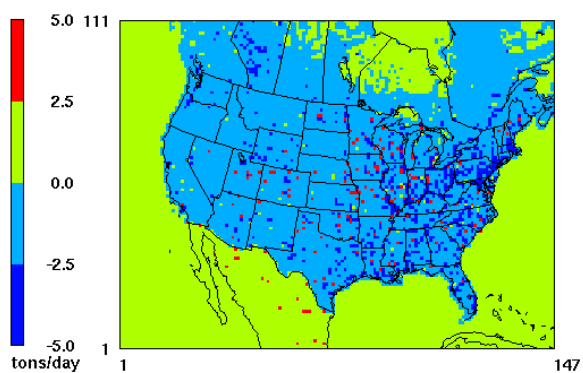

(b)

VOCs: Future summers – Historic summers

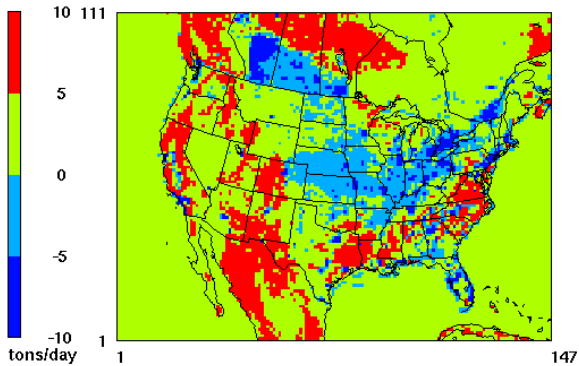

(c)

NH<sub>3</sub>: Future summers – Historic summers

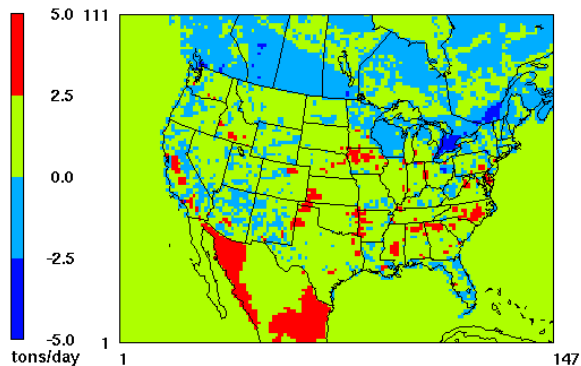

(d)

NO<sub>x</sub>: Future summers\_np – Historic summers

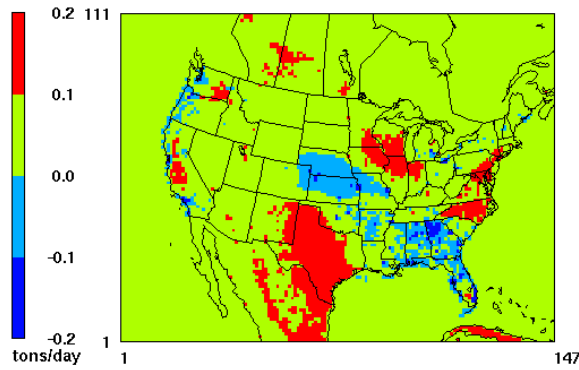

(a)

SO<sub>2</sub>: Future summers\_np – Historic summers

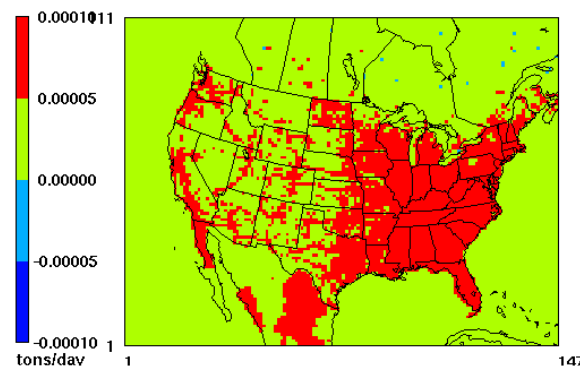

(b)

VOC<sub>s</sub>: Future summers\_np – Historic summers

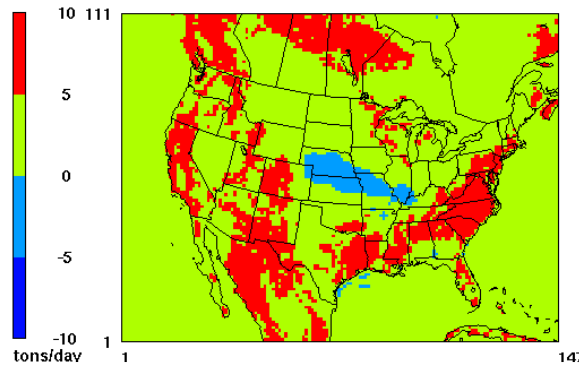

(c)

NH<sub>3</sub>: Future summers\_np – Historic summers

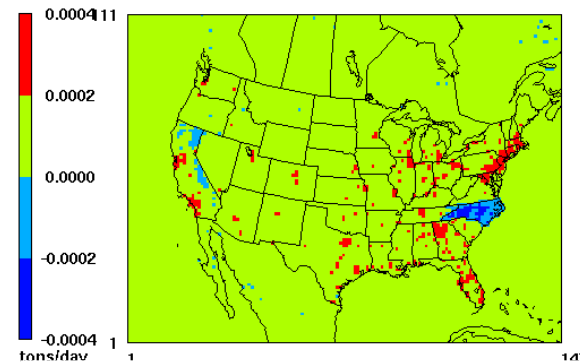

(d)

Fig. S2: Spatial distribution plots of the changes in emissions between historic and future summers caused by climate change alone a: NO<sub>x</sub>, b: SO<sub>2</sub>, c: VOC<sub>s</sub> d: NH<sub>3</sub>

(np: 2001 emission inventory and 2050 meteorology)

O<sub>3</sub>: 2049-2049\_np

June 5

June 8

June 12

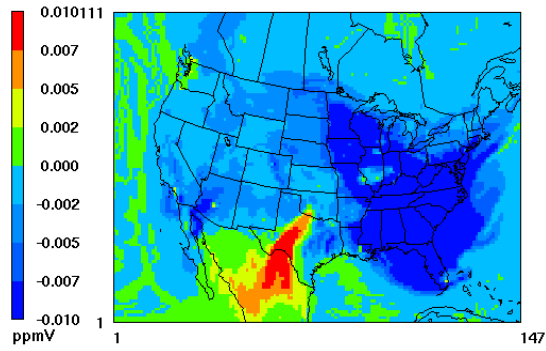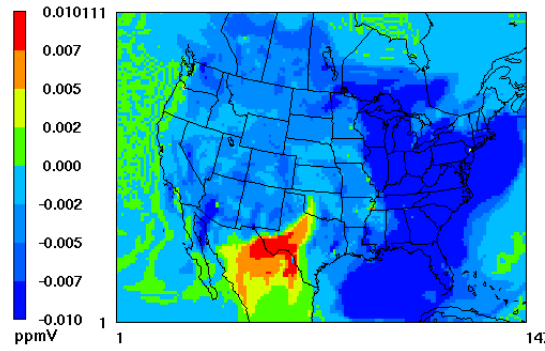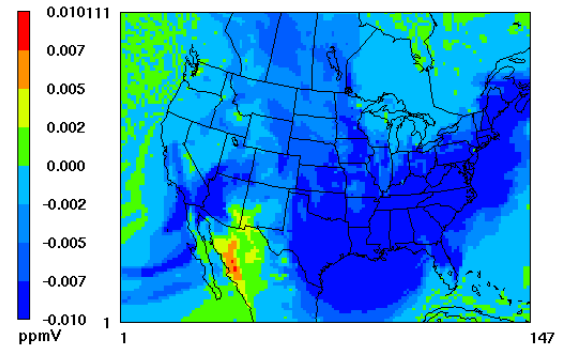

July 24

July 29

August 19

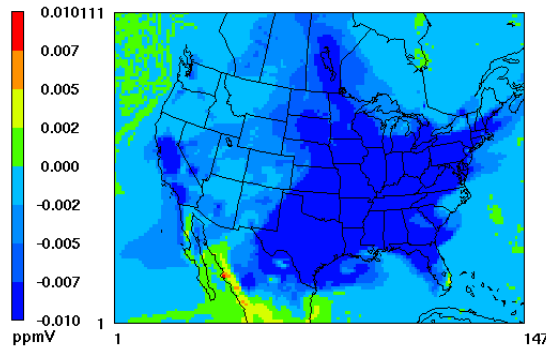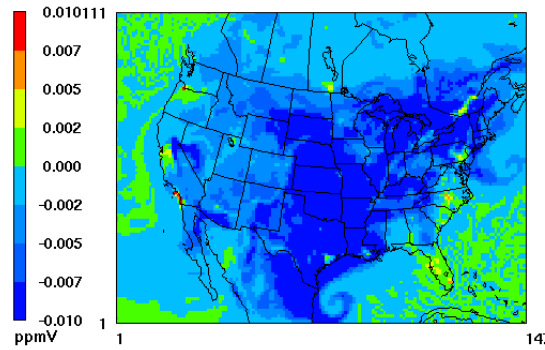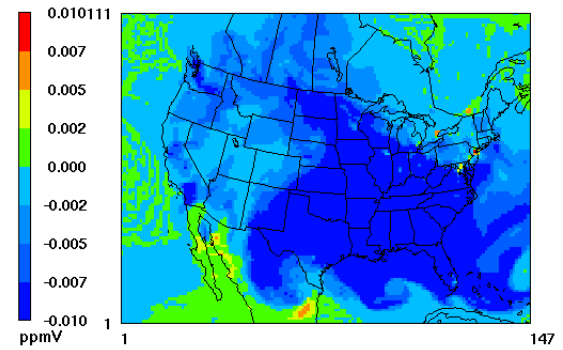

Fig. S3: O<sub>3</sub> concentration change snapshots for different dates under the impact of emission changes alone

PM<sub>2.5</sub>: 2049-2049\_np

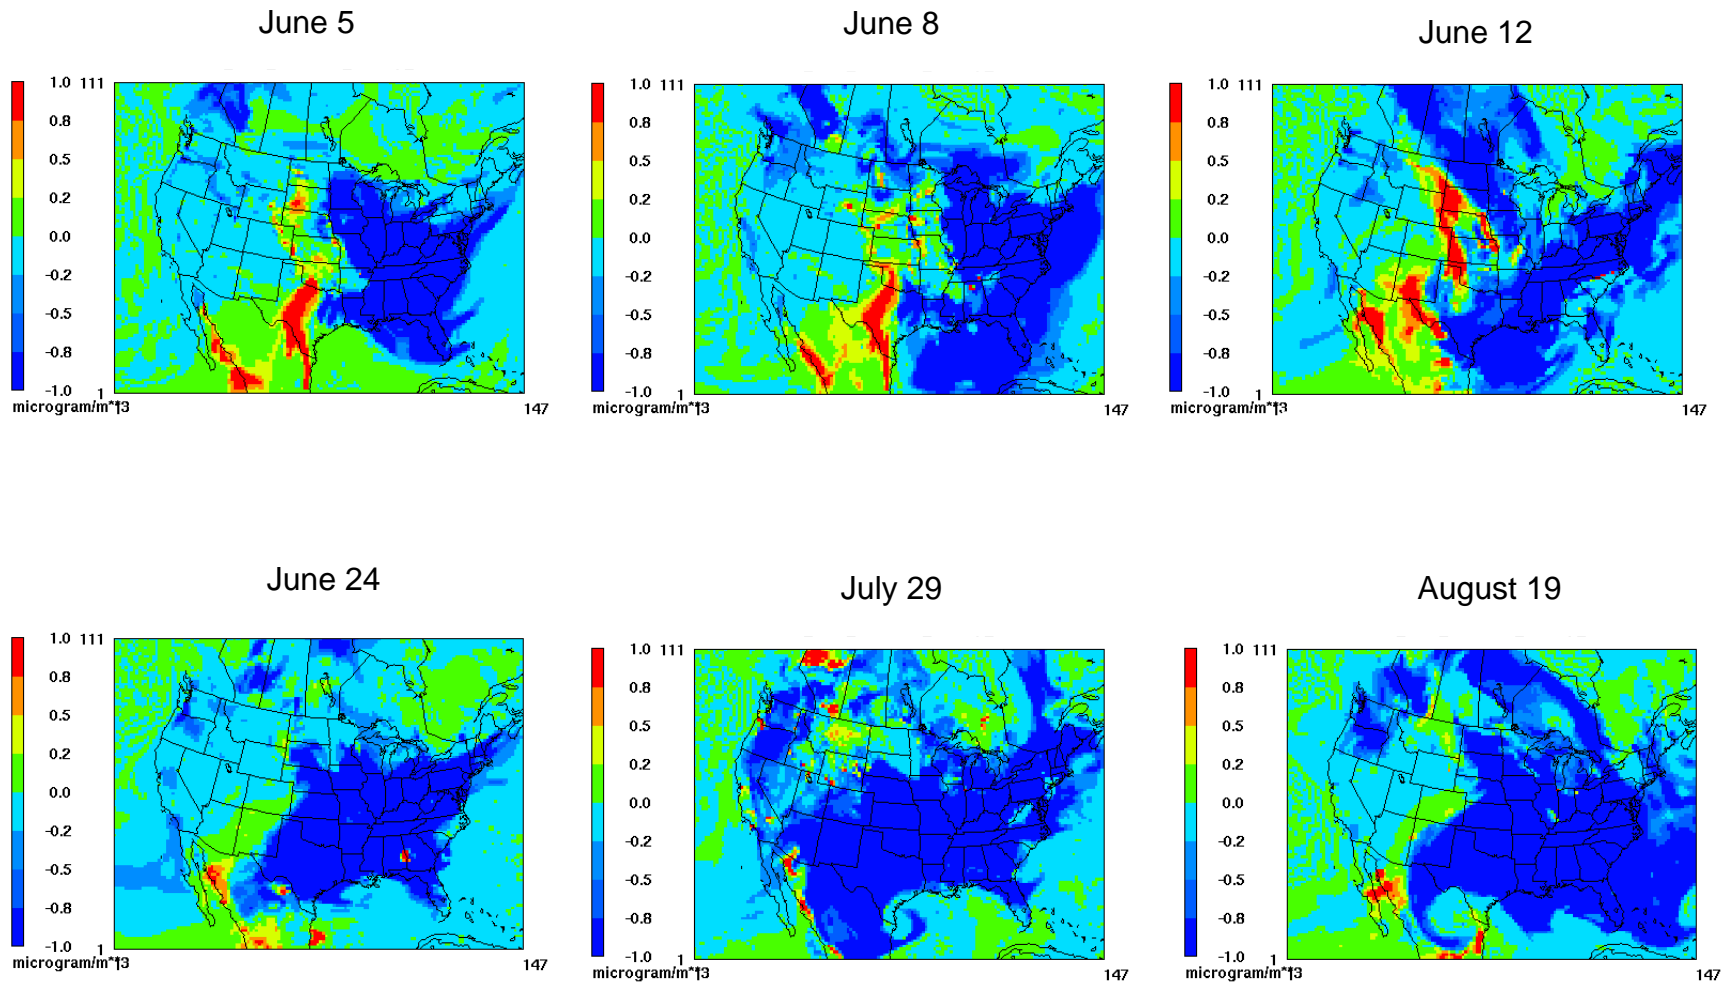

Fig. S4: PM<sub>2.5</sub> concentration change snapshots for different dates under the impact of emission changes alone
